# Supplementary material
Source: Springer Nature journal article supplement (https://www.springermedizin.de/resource/supplementary/40345_2013_27_MOESM3_ESM.pdf/25658348)
Supplement: MOESM3 [file 25658348]

**Table 3. Comparison of average stigma scores for healthcare providers ( $n = 84$ ) before and after the theatrical performance**

| Stigma measures       | T1    |      | T2    |      | Repeated $t$ -test       | $d$  |
|-----------------------|-------|------|-------|------|--------------------------|------|
|                       | $M$   | $SD$ | $M$   | $SD$ |                          |      |
| DMISS                 |       |      |       |      |                          |      |
| Treatability          | 1.74  | 0.76 | 1.52  | 0.54 | $t(83) = 2.94, p < .004$ | 0.32 |
| Relationship          | 2.38  | 0.99 | 2.06  | 0.94 | $t(83) = 4.35, p < .001$ | 0.48 |
| Hygiene               | 1.93  | 0.99 | 1.67  | 0.87 | $t(83) = 3.42, p = .001$ | 0.37 |
| Anxiety               | 1.72  | 0.89 | 1.60  | 0.82 | $t(83) = 2.14, p = .035$ | 0.24 |
| Visibility            | 3.40  | 0.84 | 3.40  | 0.83 | $t(83) = 0.01, p = .990$ | 0.00 |
| Recovery              | 2.55  | 1.31 | 2.20  | 1.38 | $t(83) = 2.44, p = .017$ | 0.27 |
| Professional efficacy | 2.74  | 1.35 | 2.53  | 1.32 | $t(83) = 1.78, p = .079$ | 0.20 |
| Total                 | 2.26  | 0.63 | 2.07  | 0.61 | $t(83) = 5.55, p < .001$ | 0.58 |
| MICA                  |       |      |       |      |                          |      |
| Total Sum             | 30.61 | 6.52 | 29.77 | 6.61 | $t(81) = 1.56, p = .123$ | 0.17 |

Note: DMISS = Day's Mental Illness Stigma Scale; MICA = Mental Illness: Clinicians' Attitudes Scale- Version 4
